## mKlf7, a potential transcriptional regulator of TrkA nerve growth factor receptor expression in sensory and sympathetic neurons

Lei Lei, Long Ma, Serge Nef, To Thai and Luis F. Parada\*

Center for Developmental Biology and Kent Waldrep Foundation Center for Basic Research on Nerve Growth and Regeneration, University of Texas, Southwestern Medical Center, 6000 Harry Hines Boulevard, Dallas, TX 75390-9133, USA

\*Author for correspondence (e-mail: luis.parada@utsouthwestern.edu)

Accepted 17 January; published on WWW 13 March 2001

### SUMMARY

Development of the nervous system relies on stringent regulation of genes that are crucial to this process. TrkA, the receptor for nerve growth factor (NGF), is tightly regulated during embryonic development and is essential for the survival and differentiation of neural crest-derived sensory and sympathetic neurons. We have previously identified a mouse *TrkA* enhancer and have characterized several *cis* regulatory elements that are important for appropriate TrkA expression *in vivo*. We now report the cloning of a novel gene encoding a Kruppel-like factor from a mouse dorsal root ganglion expression library. This

Kruppel-like factor, named mKlf7, binds specifically to an Ikaros core binding element that is crucial for *in vivo* *TrkA* enhancer function. Using *in situ* hybridization, we demonstrate that *mKlf7* is coexpressed with *TrkA* in sensory and sympathetic neurons during embryogenesis and in adulthood. These data are consistent with the idea that mKlf7 may directly regulate *TrkA* gene expression in the peripheral nervous system.

Key words: Enhancer, Kruppel-like factor, Neurotrophin, Neural crest, TrkA, Gene regulation, Mouse

### INTRODUCTION

Neural development is a complex process that involves the generation of diverse cell types assembled into functional circuits. Neuronal cell fate specification is determined by positional information, cell-cell interaction, extracellular and intracellular signaling events, transcription factor cascades, and ultimately, differential expression of neuronal genes. Different types of transcription factors such as basic helix-loop-helix (bHLH) proteins, homeodomain proteins and zinc-finger proteins have been identified to play important roles in neuronal determination and differentiation (Anderson, 1994; Anderson and Jan, 1997; Jan and Jan, 1990; Jan and Jan, 1993; Nolo et al., 2000; Pfaff and Kintner, 1998). Despite advances in understanding of transcriptional regulation in neural development, it is likely that additional, as yet unidentified transcription factors participate in this complex and highly regulated process. A challenge remains to ascribe physiologically relevant target genes for many of the identified regulatory transcription factors.

The nerve growth factor (NGF) family of neurotrophins (NTs) and their receptors play fundamental roles in the developing nervous system (Levi-Montalcini, 1987; Lewin and Barde, 1996; Snider, 1994). Besides NGF, this neurotrophin family also includes brain-derived neurotrophic factor (BDNF), NT3, and NT4/5. These NTs interact specifically with the Trk family of receptor tyrosine kinases (Bothwell, 1995; Parada et al., 1992). NGF binds TrkA, NT3 preferentially binds

TrkC, while BDNF and NT4/5 bind TrkB. As target-derived trophic factors, neurotrophins are broadly expressed in both neural and non-neural innervation target tissues while Trk receptors are primarily expressed in neurons (Klein et al., 1990; Martin-Zanca et al., 1990; Tessarollo et al., 1993). *TrkA* (*Ntrk1* – Mouse Genome Informatics) is specifically expressed in neural crest-derived sensory and sympathetic neurons in the peripheral nervous system (PNS), including dorsal root ganglia (DRG), trigeminal ganglia (TG), superior and jugular ganglia, and sympathetic ganglia (Martin-Zanca et al., 1990; Schecterson and Bothwell, 1992). In the central nervous system (CNS), *TrkA* expression is limited to a few populations of cells including cholinergic neurons in the basal forebrain and striatum, and some interneurons in the spinal cord (Holtzman et al., 1992; Liebl et al., 2001; Sobreviela et al., 1994). Consistent with cell culture and pharmacological experiments, the generation of *TrkA* and *NGF* knockout mice directly demonstrates the requirement of NGF- and TrkA-mediated signaling in the development of peripheral sensory and sympathetic neurons (Snider, 1994). In either *NGF*- or *TrkA*-null mice, about 70-80% of dorsal root ganglion (DRG) neurons, 70% of trigeminal neurons and 99% of superior cervical ganglion (SCG) neurons are lost through apoptosis (Crowley et al., 1994; Smeyne et al., 1994). In the CNS, TrkA appears to be required for the normal maturation of basal forebrain and striatal cholinergic neurons although most of these neurons survive in *TrkA*-null mice for the lifespan of the mutant animals (Fagan et al., 1997).

Although *TrkA* is expressed in specific areas of the nervous system, little is known about the forces that control such stereotypic expression. To date, the only known gene implicated in regulating *TrkA* expression encodes the POU domain transcription factor *Brn3a* (Pou4f1 – Mouse Genome Informatics; Huang et al., 1999). In *Brn3a*-null mice, the onset of *TrkA* expression in trigeminal ganglia at embryonic day (E) 11.5 is normal, but no *TrkA* expression is detectable after E17.5. Therefore, although *Brn3a* may be important for the maintenance of *TrkA* expression, it apparently is not required for initiation of *TrkA* expression in sensory ganglia (Huang et al., 1999). It remains to be tested whether *Brn3a* regulates *TrkA* expression directly during late development.

To better understand *TrkA* expression and to identify transcription factors that are critical for sensory and sympathetic neuron specification, we isolated a mouse *TrkA* enhancer and functionally characterized the *cis* regulatory elements within this genomic fragment using transgenic mouse embryos (Ma et al., 2000). Functional analysis revealed that *TrkA* expression is coordinately controlled by multiple *cis* elements including consensus DNA-binding core sequences defined for the transcription factor families DELTAEF, HAND, MZF, Ikaros, E box-binding protein, ETS and AP1. Therefore, in vivo, multiple transcription factors binding to these *cis* elements cooperate to regulate *TrkA* expression (Ma et al., 2000).

In this study, we identify a novel gene encoding a Kruppel-like zinc-finger protein isolated through expression cloning from a mouse E13.5 DRG expression library. We have named this gene *mKlf7* (murine Kruppel-like factor 7) based on its significant sequence homology to human *UKLF* (ubiquitous Kruppel-like factor), also called *KLF7* by the Human Gene Nomenclature Committee (Matsumoto et al., 1998; Turner and Crossley, 1999). We provide evidence that *mKlf7* is a transcription factor that may directly regulate *TrkA* expression in vivo. Because *mKlf7* gene expression precedes that of *TrkA* and continues into adulthood, it is further possible that *mKlf7* is required for both initiation and maintenance of *TrkA* gene expression.

## MATERIALS AND METHODS

### Expression cloning

A cDNA expression library was constructed using mRNA isolated from mouse E13.5 dorsal root ganglia and directionally cloned into the *EcoRI/XhoI* sites of the lambda ZAP Express vector (Stratagene) (J. Merenmies, K. Vogel and L. F. P., unpublished). This expression library was screened using oligonucleotide probes as described (Singh et al., 1988). The probes contained three copies of the wild-type Ikaros2, MZF2 or HAND sites from the mouse *TrkA* minimal enhancer. The sequences are Ikaros2(3×), 5'-AAAT GAA AAA TAG TGG GAG AGA AGA GTC GAA AAA TAG TGG GAG AGA AGA GTC GAA AAA TAG TGG GAG AGA AGA GTC-3'; MZF2(3×), 5'-AAAT CAG AAC CTG GGG AGA AAAA CAG AAC CTG GGG AGA AAA ACA GAA CCT GGG GAG AAA AA-3'; and HAND(3×), 5'-AAAT AAC GCT CTC CAG ACC CTA GT AAC GCT CTC CAG ACC CTA GTA ACG CTC TCC AGA CCC TAGT-3'. One copy of each binding site is underlined and the core sequence for each binding site is highlighted in bold. The 5' overhang of each oligonucleotide (italics) was added to facilitate labeling with radioactive nucleotides and cloning into the pHisi-1 vector (Clontech, see below), respectively. Each probe was labeled with [ $\alpha$ -<sup>32</sup>P]-dATP and [ $\alpha$ -<sup>32</sup>P]-dCTP using the Klenow enzyme in the presence of cold

dGTP and dTTP. Probes were then purified using Sephadex G-25 spin column (Boehringer Mannheim). After three rounds of screening, positive lambda phages were purified and the cDNA inserts were excised in vivo using helper phages (Stratagene) and sequenced.

### Cellular localization of mKlf7 proteins

The coding region of *mKlf7* was amplified by PCR using primers to generate an *EcoRI* site at the N terminus and an *XhoI* site at the C terminus. The PCR product was cloned into the pGemTeasy vector (Promega) and sequenced. The *mKlf7* fragment was then released by *EcoRI/XhoI* digestion and cloned into *EcoRI/XhoI* sites of the vector pEGFP-C2 (Clontech) to generate the construct pEGFP-Klf7 expressing GFP-Klf7 fusion proteins. Human embryonic kidney 293 (HEK293) cells and mouse neuroblastoma-rat glioma hybrid 108 (NG108) cells were plated on poly-D-lysine coated coverslips and subsequently transfected with 1  $\mu$ g of pEGFP-Klf7 or pEGFP-C2 plasmid using Fugene 6 reagents (Boehringer Mannheim). 48 hours after transfection, cells were fixed with 4% paraformaldehyde (PFA) for 30 minutes at 4°C, washed with PBS twice and incubated with 1  $\mu$ g/ml 4,6-diamidino-2 phenylindole (DAPI) for 30 minutes at 4°C. Cells were then washed with PBS three times and coverslips were mounted onto glass slides. Cells were viewed using a fluorescence microscope.

### Expression and purification of recombinant mKlf7 proteins

The cDNA fragment encoding the C-terminal DNA-binding domain (amino acid 213-301) of *mKlf7* was amplified by PCR using primers to generate an *EcoRI* site at the N terminus and an *XhoI* site at the C terminus. The PCR product was cloned into pGemTeasy and sequenced. The *mKlf7* fragment was released and subcloned into the *EcoRI/XhoI* sites of pGEX4T1 vector (Amersham) to generate the construct pGEX-Klf7C expressing GST-Klf7(213-301) fusion proteins. pGEX-Klf7C was transformed into *Escherichia coli* BL21 cells. Cells were grown at 37°C in LB/ampicilin until OD<sub>600</sub> was about 0.6 and isopropylthio- $\beta$ -galactoside (IPTG) was added at a final concentration of 1 mM. Cells were further incubated for 2 hours, harvested and GST-Klf7(213-301) proteins were purified using Glutathione-Sepharose 4B beads (Pharmacia). To use as controls, plasmids encoding GST, GST-p75 intracellular domain fusion protein (GST-p75ICD), or GST-Brn3a were used to transform BL21 cells; recombinant proteins were purified using Glutathione-Sepharose 4B beads. The GST-p75ICD plasmid and the GST-Brn3a plasmid were kindly provided by Drs Moses Chao and Mengqing Xiang, respectively. p75 is the low-affinity receptor for NGF.

### Gel mobility shift assay (EMSA)

The EMSA protocol was as described (Lei et al., 1998). Each probe contains one copy of wild-type Ikaros2 (5'-GAA AAA TAG TGG GAG AGA AGA GTC-3'), MZF2 (5'-CAG AAC CTG GGG AGA AAA A-3') or HAND (5'-AAC GCT CTC CAG ACC CTA GT-3') site from the *TrkA* minimal enhancer. The core sequence of each binding site is highlighted in bold. The sequence of the Ikaros2 mutant oligonucleotide is 5'-GAA AAA TAG TAA AGG AGA AGA GTC-3' in which the core sequence was changed to AAAG. Probes were end-labeled with [ $\gamma$ -<sup>32</sup>P]-ATP using T4 polynucleotide kinase and purified using Sephadex G25 spin columns. In a 20  $\mu$ l reaction, GST-Klf7(213-301) or GST-p75ICD proteins were incubated with 6.7  $\mu$ l Buffer S (75 mM Hepes, pH 7.9, 37.5 mM MgCl<sub>2</sub>, 30  $\mu$ M ZnSO<sub>4</sub>, 60% glycerol and 0.3% Tween 20), 1  $\mu$ g poly(dI-dC)-poly(dI-dC), 1  $\mu$ g bovine serum albumin (BSA) and 20,000 cpm of an appropriate probe. The salt concentration was adjusted to 100 mM NaCl for each reaction. Samples were incubated at room temperature for 20 minutes and loaded onto a 4.5% non-denaturing polyacrylamide gel, separated in 0.5× TBE at 120 V for 3 hours. The gel was dried, exposed to Kodak X-OMAT AR films and analyzed by autoradiograph. For competition experiments, cold oligonucleotides were added 15 minutes prior to the addition of the labeled probe.

### Yeast transformation and one-hybrid assays

Ikaros2(3×), MZF2(3×) and HAND(3×) oligonucleotides were cloned into the *EcoRI/XbaI* sites of the pHis1-1 vector, respectively. The pHis1-1 vector contains the *HIS3* reporter gene downstream of a *HIS3* minimal promoter (Clontech). Each construct was confirmed by DNA sequencing and integrated into the *HIS3* locus of yeast strain YM4271 (Clontech) to generate the reporter strains YM4271-IK, YM4271-MZF or YM4271-HAND. The coding region of *mKlf7* was cloned into the vector pGADT7 (Clontech) to generate the construct pGAD-Klf7 encoding the Gal4 activation domain-Klf7 fusion protein. pGADT7 and pGAD-Klf7 were transformed into YM4271, YM4271-IK, YM4271-MZF or YM4271-HAND and selected on SD-Leu plates. Single colonies from each transformed strain were streaked onto SD-His-Leu plates to test the expression of the *HIS3* reporter gene.

### Northern blots and RT-PCR

Total RNA was isolated from adult mouse tissues using TRIZOL (Gibco BRL) following the manufacturer's instruction. An estimated 10 µg of denatured total RNA from each sample was electrophoresed on a 1.5% formaldehyde/agarose gel and transferred to a Hybond N+ nylon membrane (Amersham). Hybridization was performed with the NorthernMax prehybridization/hybridization buffer (Ambion). Probes were generated by random priming with [ $\alpha$ -<sup>32</sup>P]-dCTP (RediPrime kit, Amersham) using as templates cDNAs for *mKlf7* and *G3PDH* (*Gapd* – Mouse Genome Informatics) After the initial hybridization with the *mKlf7*-specific probe and autoradiograph, the blots were stripped of the remaining radioactivity by rinsing the membrane twice with a boiling 0.5% sodium dodecyl sulfate (v/w) solution and rehybridized with a *G3PDH*-specific probe to compare the quantity of RNA loaded.

For RT-PCR, total RNAs isolated from E8.5 embryos or E13.5 DRGs were used as templates to synthesize cDNAs using the Superscript II reverse transcriptase and oligo-dT primers (Gibco-BRL). The PCR program was as follows 1 minute at 94°C, 1 minute at 59°C, 2 minutes at 72°C; repeated for 25 cycles with a final extension of 5 minutes at 72°C. The gene-specific primers used in the PCR reactions were TrkA, sense 5'-TCA GCA CCG AGA GTG ATG TGT GGA GCTT-3', antisense 5'-GGA TCC TAG CCC AGC ACG TCC AGG TAA CTC GGT-3'; mKlf7, sense 5'-TTT CCT GGC AGT CAT CTG CAC-3', antisense 5'-GGG TCT GTT TGT TTG TCA GTC TGTC-3'; and G3PDH, sense 5'-ACC ACA GTC CAT GCC ATC AC-3', antisense 5'-TCC ACC ACC CTG TTG CTG TA-3'. The PCR product of *mKlf7*, from -301 to -52 relative to the start codon, is highly divergent among Klf family members.

### Single neuron cDNA library and PCR

E13.5 DRG neurons were dissected and plated as described (Vogel et al., 1995). Neurons were kept in culture for 2 days in media containing either NGF (10 ng/ml) or NT3 (10 pg/ml). The DRG neuronal plates were washed with PBS without Ca<sup>2+</sup>/Mg<sup>2+</sup> and single neurons were picked under a microscope and injected into 500 µl PCR tubes each containing 4 µl of ice-cold cDNA lysis buffer. Single-cell cDNA synthesis and amplification were performed and checked as described (Dulac and Axel, 1995). To determine the pattern of gene expression in NGF- or NT3-dependent single neurons, 1 µl of amplified cDNA from each single cell was used as the template for PCR with primers specific for the genes of interest. The PCR program was the same as used in the RT-PCR. PCR products were analyzed on a 1% agarose gel. Sequences for the gene-specific primers were as follows: TrkB, sense 5'-GGA TGG AGA TCA CAG AGG GT-3', antisense 5'-AGA GGC AAA TGG GTG ACT TG-3'; TrkC, sense 5'-ATG GTG TGA GGT GGG AGG AC-3', antisense 5'-TTG TAT GTG TAG CAG GCA CT-3'; CGRP (calcitonin gene related peptide), sense 5'-GCA GCC TCC AGG CAG-3', antisense 5'-GAA GGT CCC TGC GGC G-3'; mKlf7, sense 5'-GCA CAG TGA CGT TGA AAC TGG TG-3', antisense 5'-TGG TCA GAC CTG GAG AAA CAC CTG-3'; and

NCAM (neural cell adhesion molecule), sense 5'-GAA GGA GGG ATG GAC TCC AC-3', antisense 5'-TTG AAC ACA AGT ATT CTG AC-3'. The primers for TrkA and G3PDH were the same as described previously.

### Tissue preparation

Timed pregnant ICR female mice were sacrificed at various stages to obtain embryos. Gestational age was calculated by taking the morning of the appearance of the mother's vaginal plug as E0.5. Embryos of E8.5 to E15.5 were dissected and fixed in 4% paraformaldehyde (PFA) overnight, dehydrated in 30% sucrose and 10 µm-thick sections were cut in a cryostat. For neonatal trunk sections, postpartum (P)0 pups were perfused with 4% PFA, fixed in 4% PFA overnight, dehydrated in 30% sucrose and 10 µm sections were collected. Adult brains were quickly dissected out after the animals were perfused with 4% PFA, fixed overnight with 4% PFA, dehydrated in 30% sucrose and 10 µm sections were collected. Adult trigeminal ganglia were dissected out, fixed overnight with 4% PFA, processed and embedded in paraffin, and 5 µm serial sections were collected using a microtome.

Mice with a targeted deletion in *TrkA* were maintained as described (Liebl et al., 1997). To obtain DRG sections, neonatal pups from the mating of *TrkA* heterozygous mice were perfused with 4% PFA, their spinal columns dissected out, fixed in Bouin's solution overnight, washed extensively with 70% ethanol, processed and embedded in paraffin. Sections (10 µm) were collected using a microtome. The tail DNA from each pup was used for genotyping by Southern blots (data not shown).

### In situ hybridization

Cryostat or paraffin sections were processed for in situ hybridization as described (Martin-Zanca et al., 1990; Nef et al., 1996). [ $\alpha$ -<sup>35</sup>S]-CTP-labeled radioactive antisense cRNAs were produced by in vitro transcription with the T7 RNA polymerase using the Riboprobe Combination System (Promega). *mKlf7* antisense cRNA probe was synthesized using as a template the 1.3 kb fragment comprising the entire cDNA shown in Fig. 1A. *TrkA* antisense cRNA probe was synthesized using a 454 bp fragment encoding the mouse TrkA extracellular domain as the template. After in situ hybridization, slides were counterstained with Hematoxylin for bright field views. Both bright-field and dark-field micrographs were taken using a digital camera. In Fig. 7, the sections were digitally photographed using phase-contrast and dark-field microscopy sequentially, and the dark field images were processed in Adobe Photoshop to display the in situ signals as green particles. The dark field images were then superimposed onto the phase-contrast images to show the cellular morphology and the localization of the in situ signals.

## RESULTS

### Cloning of *mKlf7*

Several consensus *cis* regulatory elements within the mouse *TrkA* enhancer are crucial for its specific activity in sensory and sympathetic neurons during mouse embryogenesis (Ma et al., 2000). These *cis* elements include, among others, two Ikaros sites (Ikaros1 and Ikaros2), two MZF sites (MZF1 and MZF2) and a HAND site. To identify transcription factors present in relevant tissues that may directly bind these DNA elements and potentially regulate endogenous *TrkA* expression, we screened a mouse E13.5 DRG cDNA expression library using a mixture of three [<sup>32</sup>P]-labeled oligonucleotide probes, each containing three copies of the Ikaros2, MZF2 or HAND consensus binding sites. After three rounds of hybridization, six positive lambda phage clones were identified. Sequence analysis of the cDNA inserts indicated two identical clones containing a 903

base pair open reading frame (ORF) preceded by termination codons. This ORF encodes a novel murine Kruppel-like zinc-finger transcription factor (Fig. 1A). The overall amino acid sequence identity between this protein and human UKLF, also known as KLF7, is over 97% (Matsumoto et al., 1998; Turner and Crossley, 1999). Therefore, we named this murine gene *mKlf7*, based on the significant sequence conservation.

*mKlf7* protein has a calculated molecular weight of 33.3 kDa and an estimated isoelectric point (pI) of 8.82. Similar to UKLF, the primary structure of *mKlf7* protein consists of three distinct domains (Fig. 1B). The N-terminal region (amino acid residues 1-76) is negatively charged and enriched in serines and glutamic acids. This region is identical to the N-terminal region of human UKLF, which was shown to be a transactivation domain (Matsumoto et al., 1998). The central region of *mKlf7* (residues 77-211) is enriched in hydrophobic residues and serines, which may serve as a protein interaction domain. The amino acid identity between *mKlf7* and UKLF in this region is 94.8%. A putative leucine-zipper motif (residues 98-119) is conserved in both UKLF and *mKlf7*. The C-terminal region of *mKlf7* (residues 212-301) is a potential DNA-binding domain consisting of three zinc fingers of the Cys<sub>2</sub>-His<sub>2</sub> type. This region is identical in both *mKlf7* and UKLF. The nuclear localization signal KKRVRH identified in human UKLF is also conserved in *mKlf7* (residues 214-219), just upstream of the first zinc finger (Matsumoto et al., 1998).

***mKlf7* is a nuclear protein that binds the Ikaros2 site on the *TrkA* enhancer**

To test whether the *mKlf7* gene encodes a nuclear protein, the full-length *mKlf7* cDNA was fused in frame with a DNA fragment encoding the green fluorescent protein (GFP). Cellular localization of the GFP-*Klf7* fusion protein was monitored by GFP fluorescence and DAPI staining of transfected HEK293 and NG108 cells (Fig. 2). GFP-*Klf7* proteins accumulated exclusively in the nuclei of both HEK293 and NG108 cells after transfection, while control GFP proteins were detected in the entire cell bodies of transfected cells. These data confirm that *mKlf7* is a nuclear protein.

*mKlf7* was initially cloned by screening an embryonic DRG expression library using a mixture of three probes including Ikaros2, MZF2 and HAND binding sites. To determine which *cis* element binds *mKlf7*, GST-*Klf7C*, which contains the C-terminal DNA-binding domain (amino acid residues 213-301) of *mKlf7* fused in frame with GST (glutathione-S-transferase), was expressed and purified from *E. coli* (data not shown). Recombinant proteins GST-*Klf7C* or GST-p75ICD (GST-p75 intracellular domain) as a control, were incubated with Ikaros2, MZF2 or HAND probes in gel shift reactions (Fig. 3A). As shown, GST-*KLF7C* binds specifically to the Ikaros2 site but not to either the MZF2 site or the HAND site. Similar to GST-p75ICD, several additional

proteins including GST and GST-Brn3a, fail to bind these probes (data not shown). Thus, *mKlf7* exhibits specificity among the three functional sites in the *TrkA* enhancer, even though both Ikaros2 and MZF2 sites are conserved binding sites for transcription factors containing Kruppel-type zinc fingers in

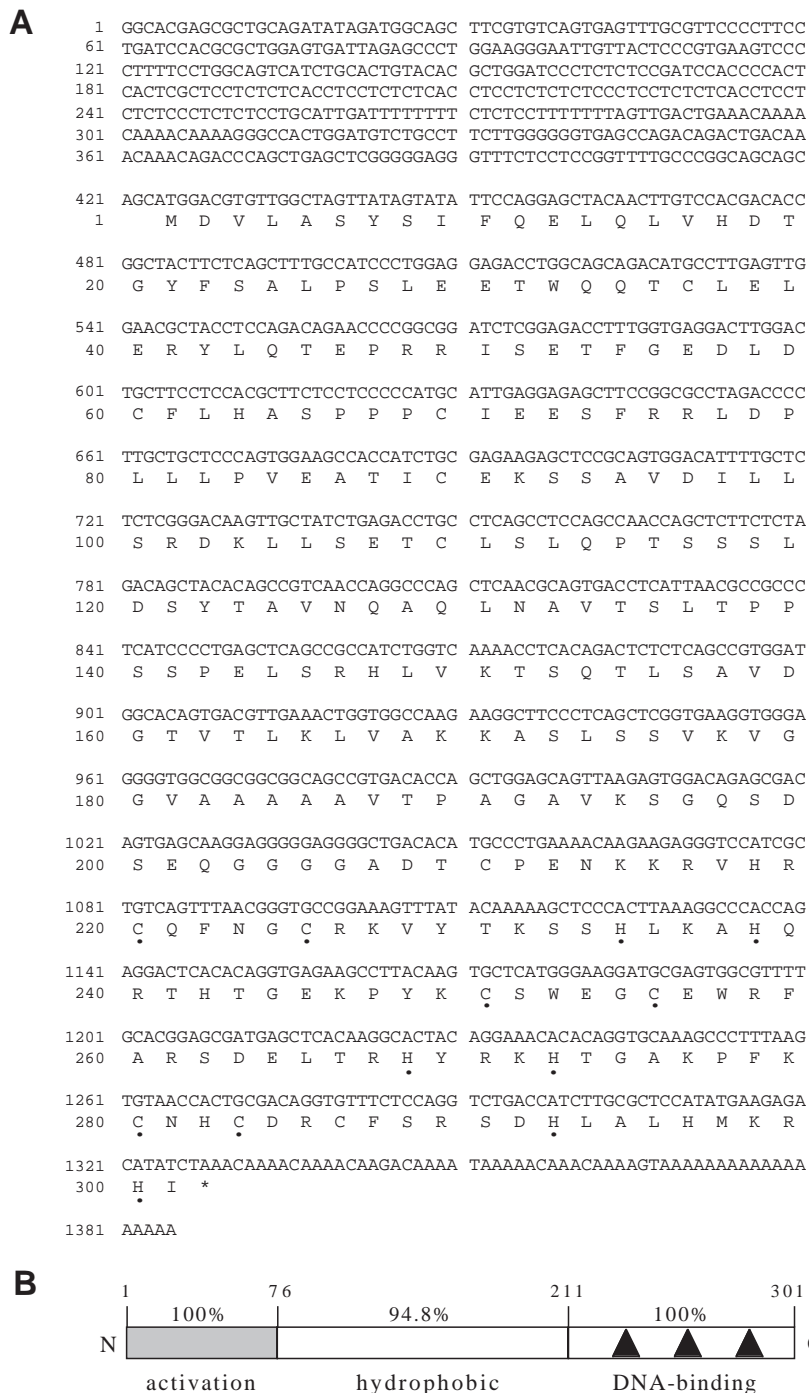

**Fig. 1.** Sequence analysis of *mKlf7* cDNA and protein. (A) Nucleotide and deduced amino acid sequences. Cysteines and histidines of the zinc fingers are highlighted by black circles underneath. (B) Domain structure of the *mKlf7* protein. The triangles indicate the three zinc fingers of the C-terminal DNA-binding domain. The amino acid identity between *mKlf7* and human UKLF for each region is also shown. The sequence of *mKlf7* gene has been deposited in the GenBank (Accession Number, AF338369).

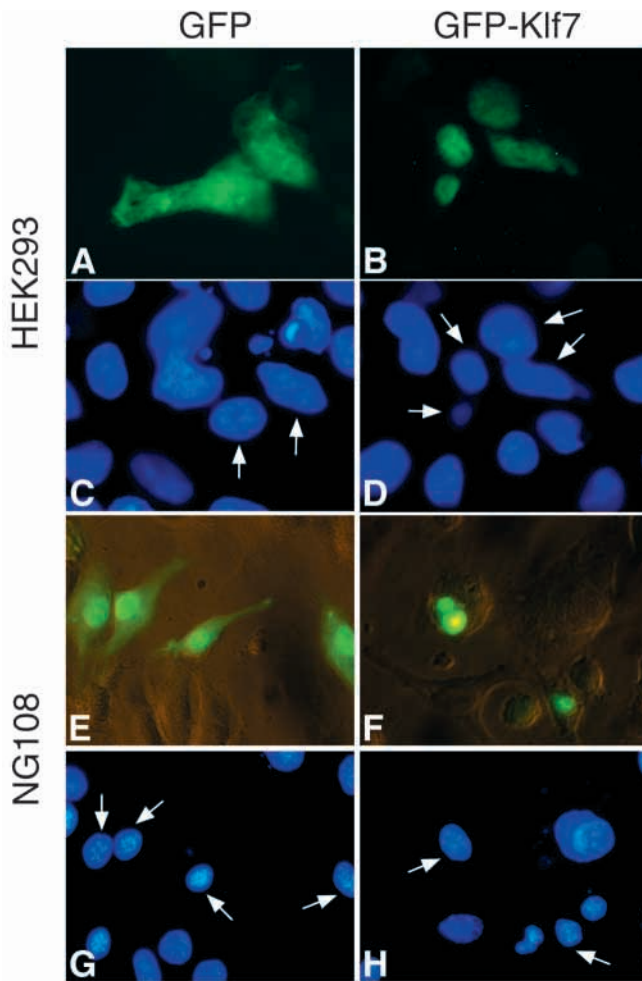

**Fig. 2.** Nuclear localization of mKlf7. (A,C,E,G) Cells transfected with pEGFP-C2. (B,D,F,H) Cells transfected with pEGFP-Klf7. (A,B) GFP autofluorescence, (C,D,G,H) DAPI staining of the nuclei, and (E,F) the combination of GFP autofluorescence and light microscopy are shown. The arrows indicate the nuclei of corresponding GFP-positive cells. Cell lines are indicated on the left-hand side of the figure.

their DNA-binding domains (Georgopoulos et al., 1992; Georgopoulos et al., 1997; Hromas et al., 1991). Furthermore, unlabeled oligonucleotides containing a wild-type Ikaros2 site, but not an MZF2 site, effectively competes with the Ikaros2 probe for binding GST-Klf7C (Fig. 3B). In contrast, Ikaros2 oligonucleotides harboring mutations in the Ikaros2 core sequence that has previously been shown to disrupt *in vivo* function of the *TrkA* enhancer (Ma et al., 2000), failed to compete for binding GST-Klf7C (Fig. 3B). These results indicate that the zinc-finger domain of mKlf7 is capable of binding the wild-type Ikaros2 site *in vitro*. Moreover, the decreased affinity between mKlf7 and the mutant Ikaros site probably accounts for the reduced activity observed for a *TrkA* enhancer bearing the same mutated Ikaros2 site *in vivo*.

To further establish the interaction of mKlf7 with the Ikaros2 consensus sequence, a yeast one-hybrid approach was used (Fig. 3C). Triple copies of either Ikaros2, MZF2 or HAND sequences were cloned upstream of a minimal promoter-driven *HIS3* reporter gene and the resulting reporter plasmids were

integrated into the host strain YM4271. Plasmids encoding either the GAL4 activation domain (Gal4AD) alone or the Gal4AD-Klf7 fusion protein were transformed into these reporter strains and activation of the *HIS3* gene was analyzed by growth on SD-Leu-His plates. Gal4AD-Klf7 was able only to specifically activate expression of *HIS3* from the Ikaros2 site. Both the MZF2-driven reporter and the HAND-driven reporter exhibited 'leaky' expression in the presence of Gal4AD. However, no additional activation was detected in the presence of Gal4AD-Klf7. These results are consistent with the gel shift data and further support that mKlf7 binds the Ikaros2 site of the *TrkA* enhancer both *in vitro* and *in vivo*.

#### ***mKlf7* expression is neural specific and coincides with *TrkA***

*TrkA* is specifically expressed in neural crest-derived sensory and sympathetic ganglia during development (Martin-Zanca et al., 1990; Phillips and Armanini, 1996; Schecterson and Bothwell, 1992; Wright and Snider, 1995). Expression of *TrkA* in DRG begins at E9.5, peaks at E13.5, and remains constant during late development (Martin-Zanca et al., 1990). Transcription activators of the *TrkA* gene must be expressed in these tissues with appropriate timing. To examine whether mKlf7 could be a physiologically relevant transcription factor for regulating *TrkA* expression *in vivo*, expression of *mKlf7* was analyzed by *in situ* hybridization (Fig. 4). Similar to *TrkA* at E13.5, *mKlf7* was strongly and specifically expressed in dorsal root, trigeminal and superior XI/X complex ganglia (superior and jugular ganglia). Expression of *mKlf7* at this stage was also apparent in the CNS including developing brain and spinal cord.

One key feature of a putative *TrkA* regulatory gene would be that its expression precedes the onset of *TrkA* expression. We therefore compared the expression patterns of *mKlf7* and *TrkA* during early embryogenesis (Fig. 5). The earliest expression of *TrkA* has been reported at E9.5 (Martin-Zanca et al., 1990). We observed expression of *mKlf7* at E8.5, preceding that of *TrkA* by *in situ* hybridization (data not shown) and by RT-PCR (Fig. 5A). *mKlf7* transcripts were present at E8.5 when *TrkA* transcripts could not be detected. Fig. 5B-I shows oblique transverse sections of an E10.5 embryo and sagittal sections of an E11.5 embryo. At E10.5, *mKlf7* is expressed in trigeminal ganglion, the VII-VIII neural crest complex, and the subventricular neuroepithelium of both forebrain and hindbrain regions. *TrkA* expression is also apparent in trigeminal ganglion, the VII-VIII neural crest complex, and the subventricular neuroepithelium of the hindbrain. At E11.5, the expression of *TrkA* and *mKlf7* is stabilized in the neural crest derived sensory nervous system (compare Fig. 4 with Fig. 5). Thus *mKlf7* gene expression coincides with that of *TrkA* in neural crest-derived structures as well as in the neuroepithelium of the hindbrain, an area of *TrkA* expression that has not been previously described.

With progressing development, *TrkA* expression becomes restricted with no detectable expression in neuroepithelium after E10.5 and reduced expression in maturing cranial Ganglia VII and VIII (Fig. 6A,B). At E15.5, *mKlf7* exhibits continued coexpression with *TrkA* but also retains expression in additional neural regions including brain, spinal cord, retinal neuroepithelium and the inferior XI/X complex (nodose and petrosal ganglia) (Fig. 6C,D).

An additional functionally prominent area of *TrkA* expression is in sympathetic ganglia that acquire NGF/*TrkA* dependence for

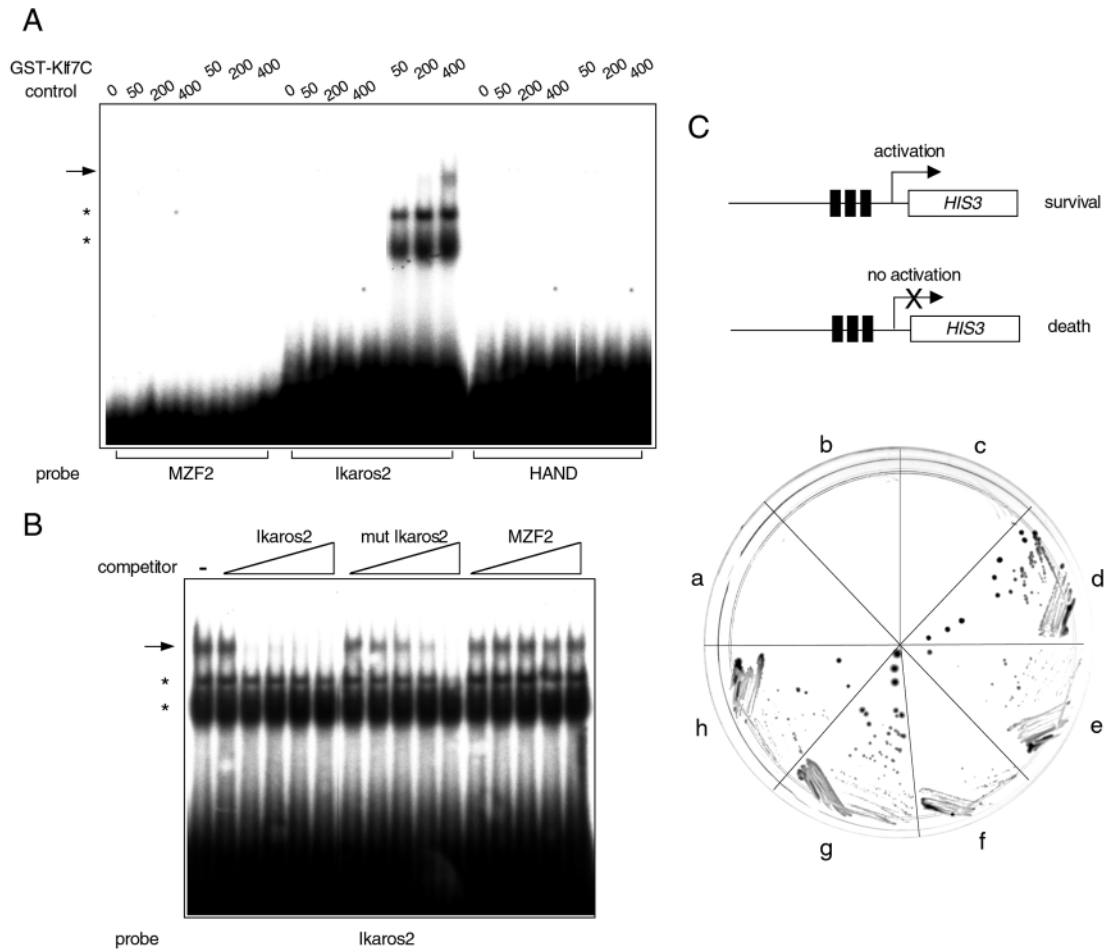

**Fig. 3.** mKlf7 binds to the Ikaros2 site of the *TrkA* minimal enhancer. (A) Increasing amounts (in ng) of purified GST-Klf7C or GST-p75ICD ('control') were incubated with the oligonucleotide probe containing either an Ikaros2 site, an MZF2 site, or a HAND site and analyzed by EMSA. (B) Increasing amounts (1×, 5×, 10×, 20× and 100×) of cold oligonucleotides containing either a wild-type Ikaros2 site, a mutant Ikaros2 site ('mut Ikaros'), or a wild-type MZF2 site were added to the gel shift reactions to compete with the wild-type Ikaros2 probe for binding GST-Klf7C. The arrows in A,B indicate the specific DNA-protein complex and the asterisks indicate nonspecific complexes. (C) Single colonies from various yeast reporter strains containing the plasmid pGADT7 or pGAD-Klf7 were streaked on SD-Leu-His plates to test expression of the *HIS3* reporter gene. (Part a) YM4271 transformed with pGADT7; (Part b) YM4271 with pGAD-Klf7; (part c) YM4271-IK with pGADT7; (part d) YM4271-IK with pGAD-Klf7; (part e) YM4271-MZF with pGADT7; (part f) YM4271-MZF with pGAD-Klf7; (part g) YM4271-HAND with pGADT7; and (part h) YM4271-HAND with pGAD-Klf7.

survival in late development (Crowley et al., 1994; Levi-Montalcini, 1987; Smeyne et al., 1994). We found that *mKlf7* was coexpressed with *TrkA* in sympathetic ganglia at P0 (Fig. 6E-H).

*TrkA* expression is maintained in adult neural crest-derived sensory and sympathetic ganglia (Kaplan et al., 1991; Phillips and Armanini, 1996). To examine whether *mKlf7* coexpression is also retained, serial sections from trigeminal ganglia of adult mice were hybridized with *TrkA* and *mKlf7* probes, respectively (Fig. 7A,B). The expression patterns suggest that *mKlf7* is coexpressed with *TrkA* in sensory nociceptive neurons. In addition, *mKlf7* is apparently expressed in all other neurons that do not express *TrkA*, but not in Schwann cells. Indeed, similar experiments using *TrkB*- (*Ntrk2* – Mouse Genome Informatics) and *TrkC*- (*Ntrk3* – Mouse Genome Informatics) specific probes demonstrate that *mKlf7* is also expressed in *TrkB*-positive neurons and *TrkC*-positive neurons (data not shown). An alternative way to examine the scope of *mKlf7* expression in sensory ganglia was to generate single cell

cDNA libraries from DRG neurons cultured in either NGF or NT3. In culture, NGF supports the survival of *TrkA*-expressing nociceptive neurons, while NT3 supports only *TrkC*-expressing proprioceptive neurons (Liebl et al., 1997). As shown in Fig. 7C, *G3PDH* and a panneuronal marker *NCAM* (*Ncam* – Mouse Genome Informatics) are detected in all neuronal libraries but not in the control libraries, while *TrkA* and *TrkC* expression display appropriate NGF or NT3 dependence, further validating the reliability and specificity of this approach. CGRP is a marker for *TrkA*-positive neurons. *mKlf7* transcripts are present not only in NGF-dependent, *TrkA*- and CGRP-positive neurons, but also in NT3-dependent, *TrkC*-expressing neurons.

To gain clear confirmation about the scope of *mKlf7* expression in sensory neurons, compared with *TrkA*, we made use of *TrkA*-null mice that lose all *TrkA*-expressing, NGF-dependent sensory neurons (Smeyne et al., 1994). *TrkA* expression is completely abolished in *TrkA*-null DRG whereas *mKlf7* expression is

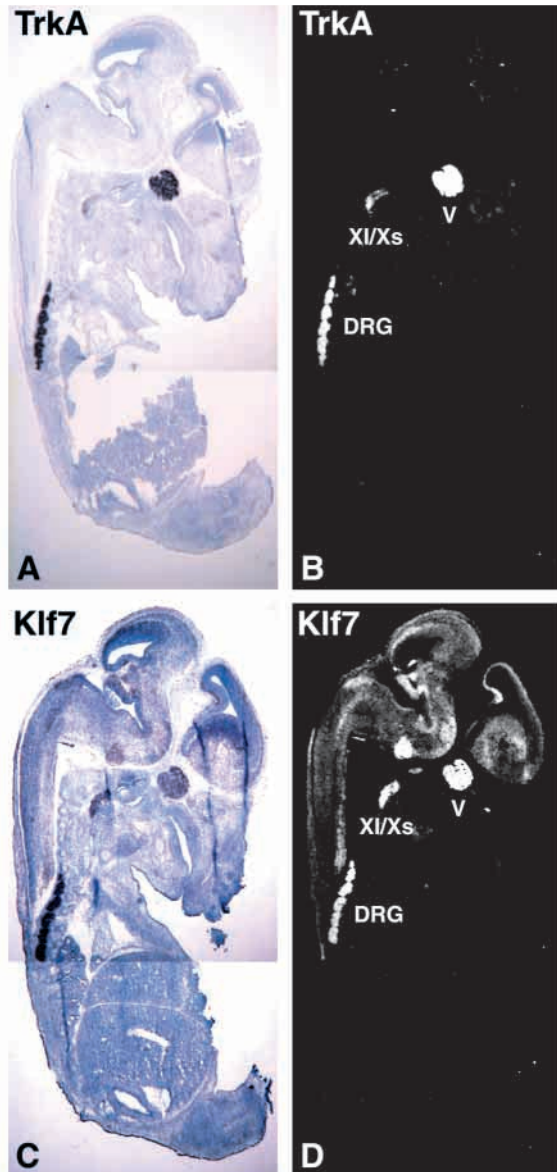

**Fig. 4.** Expression of *mKlf7* and *TrkA* genes at E13.5. Sagittal sections of an E13.5 embryo hybridized with the *TrkA* probe (A,B) or *mKlf7* probe (C,D). Both bright field images (A,C) and dark field images (B,D) are shown. DRG, dorsal root ganglion; V, trigeminal ganglion (the fifth ganglion); XI/Xs, ninth/tenth superior complex.

retained at considerably reduced levels (Fig. 8). Consistent with Fig. 7, these data lead us to conclude that *mKlf7* is expressed in all DRG and trigeminal sensory neurons including *TrkA*-positive neurons.

#### ***mKlf7* is not coexpressed with *TrkA* in the adult CNS**

We next examined *mKlf7* expression in adult tissues by northern blot analysis. *mKlf7* transcripts are detected in brain, heart, spleen and lung but not in liver, skeletal muscle, kidney or testis (Fig. 9A, and data not shown). The size of the *mKlf7* mRNA is approximately 8.5 kb, similar to that of human *UKLF* mRNA. Fig. 9B demonstrates that *mKlf7* transcripts are present in various regions of adult brain and spinal cord. To gain a better understanding of *mKlf7* expression in adult brain and to examine

whether coexpression with *TrkA* is maintained in the CNS, we performed comparative in situ hybridization (Fig. 9C-F). As previously described (Holtzman et al., 1992; Sobreviela et al., 1994), cholinergic neurons of the basal forebrain express *TrkA* (Fig. 9C,E). The identity of these *TrkA*-expressing cells was confirmed by positive staining with anti-ChAT (choline acetyltransferase) antibodies (data not shown). However, *mKlf7* expression is not detected in this region (Fig. 9D,F). The lack of *mKlf7* expression in mature basal forebrain cholinergic neurons implies that *mKlf7* may not be involved in the expression of *TrkA* in the CNS. However, it remains to be determined whether *mKlf7* is present in basal forebrain cholinergic neurons during the generation and early maturation of these cells.

Consistent with the northern blot analysis (Fig. 9B), *mKlf7* is detected in many areas of the CNS, including the cortex, hippocampus and cerebellum by in situ hybridization (Fig. 9G,H). As in the PNS, *mKlf7* is mostly, if not exclusively, expressed in neurons in the CNS. For example, in cortex (Fig. 9G), *mKlf7* is expressed strongly in neuronal layers II-VI but weakly in layer I, which contains mostly non-neuronal cells. In the cerebellum, the *mKlf7* transcript is abundant in granular neurons but absent in the white matter (Fig. 9H).

Taken together, the present results identify *mKlf7* as a *TrkA* enhancer-binding protein that is confined to the nervous system during development. In both developing and mature nervous systems, *mKlf7* gene is expressed primarily in neurons, and in all *TrkA*-expressing neurons in the PNS.

## **DISCUSSION**

### ***mKlf7* is a *TrkA* enhancer-binding protein**

Although the highly stereotypic expression of the *TrkA*-NGF receptor was reported more than a decade ago (Martin-Zanca et al., 1990), until recently, little was known about the molecular basis for regulation of its expression (Ma et al., 2000). Even less information has been available about the transcription factors that regulate such temporal- and spatial-specific expression. *Brn3a* is the only transcription factor previously identified to modulate *TrkA* expression (Huang et al., 1999). The available information implicates *Brn3a* in maintenance of *TrkA* gene expression in sensory neurons but not in initiation of expression, as *TrkA* expression initiates normally in *Brn3a* knockout mice (Huang et al., 1999). In addition, no consensus *Brn3a*-binding site is present in the *TrkA* minimal enhancer that is sufficient for driving specific expression of *TrkA* in sensory and sympathetic neurons (Ma et al., 2000).

Other candidate genes for regulating *TrkA* expression may include transcription factors that are important for the generation and differentiation of sensory and sympathetic neurons that eventually become NGF dependent for their survival. Several bHLH genes including *Mash1* (*Ascl1* – Mouse Genome Informatics) neurogenin 1 (*Ngn1*; *Neurod3* – Mouse Genome Informatics), neurogenin 2 (*Ngn2*; *Atoh4* – Mouse Genome Informatics), and the homeobox gene *Phox2b* (*Pmx2b* – Mouse Genome Informatics) are essential for the generation of sensory or sympathetic neurons (Fode et al., 1998; Guillemot et al., 1993; Ma et al., 1998; Ma et al., 1999; Pattyn et al., 1999). *Mash1* is expressed in sympathetic precursors and no sympathetic neurons are generated in

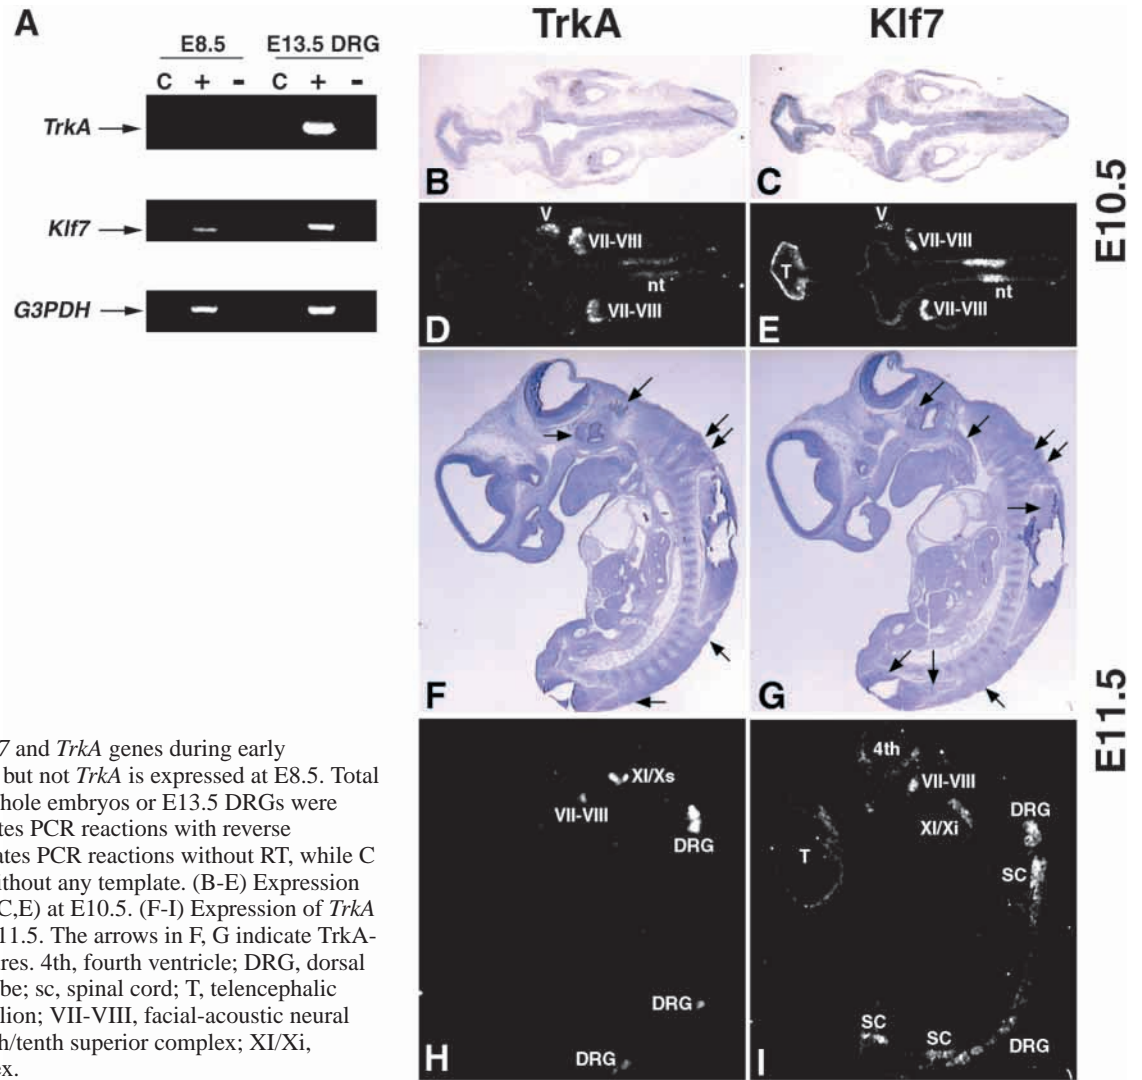

**Fig. 5.** Expression of *mKlf7* and *TrkA* genes during early embryogenesis. (A) *mKlf7* but not *TrkA* is expressed at E8.5. Total RNA isolated from E8.5 whole embryos or E13.5 DRGs were used for RT-PCR. + indicates PCR reactions with reverse transcription (RT), - indicates PCR reactions without RT, while C indicates PCR reactions without any template. (B-E) Expression of *TrkA* (B,D) and *mKlf7* (C,E) at E10.5. (F-I) Expression of *TrkA* (F,H) and *mKlf7* (G,I) at E11.5. The arrows in F, G indicate *TrkA*- and *mKlf7*-positive structures. 4th, fourth ventricle; DRG, dorsal root ganglion; nt, neural tube; sc, spinal cord; T, telencephalic vesicle; V, trigeminal ganglion; VII-VIII, facial-acoustic neural crest complex; XI/Xs, ninth/tenth superior complex; XI/Xi, ninth/tenth inferior complex.

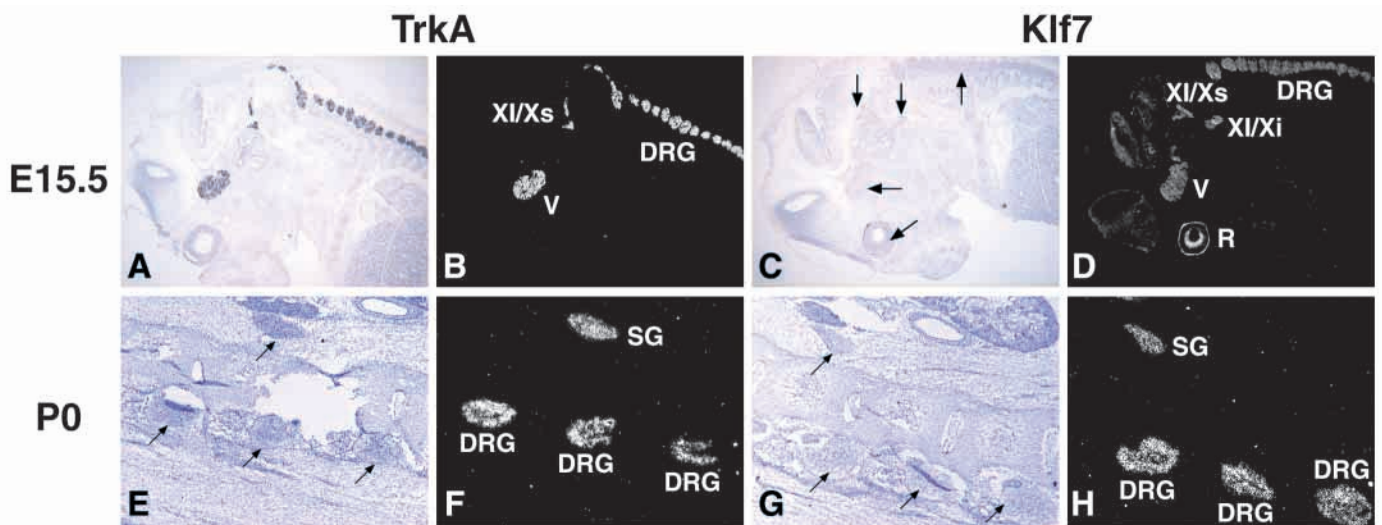

**Fig. 6.** Expression of *mKlf7* and *TrkA* genes during late embryogenesis. (A-D) Sagittal sections of an E15.5 embryo hybridized with the *TrkA* probe (A,B) or *mKlf7* probe (C,D). Only the head region of each section was shown. (E-H) Sagittal sections of a neonatal pup hybridized with the *TrkA* probe (E,F) or *mKlf7* probe (G,H). The trunk region of each section was shown. The arrows in C, E, G indicate *TrkA*- and *mKlf7*-positive ganglionic structures. DRG, dorsal root ganglion; R, retinal neuroepithelium; SG, sympathetic ganglion; V, trigeminal ganglion; XI/Xs, ninth/tenth superior complex; XI/Xi, ninth/tenth inferior complex.



**Fig. 7.** Coexpression of *mKlf7* and *TrkA* in sensory neurons. (A,B) Adjacent sections from an adult trigeminal ganglion hybridized with *TrkA* (A) or *mKlf7* (B) probes. The in situ signals were shown as green particles. The red arrowheads indicate two representative neurons expressing both *TrkA* and *mKlf7* while the blue arrowheads indicate two representative neurons expressing *mKlf7* but not *TrkA*. (C) *mKlf7* is expressed in both *TrkA*-positive neurons and *TrkC*-positive neurons. Single cell cDNA libraries were prepared from NGF- or NT3-dependent DRG neurons and expression of *mKlf7* and other marker genes in these single neurons was analyzed by PCR. PCR reactions with no template (e) or with libraries prepared in the absence of any cell as the templates (a-d) were used as controls.

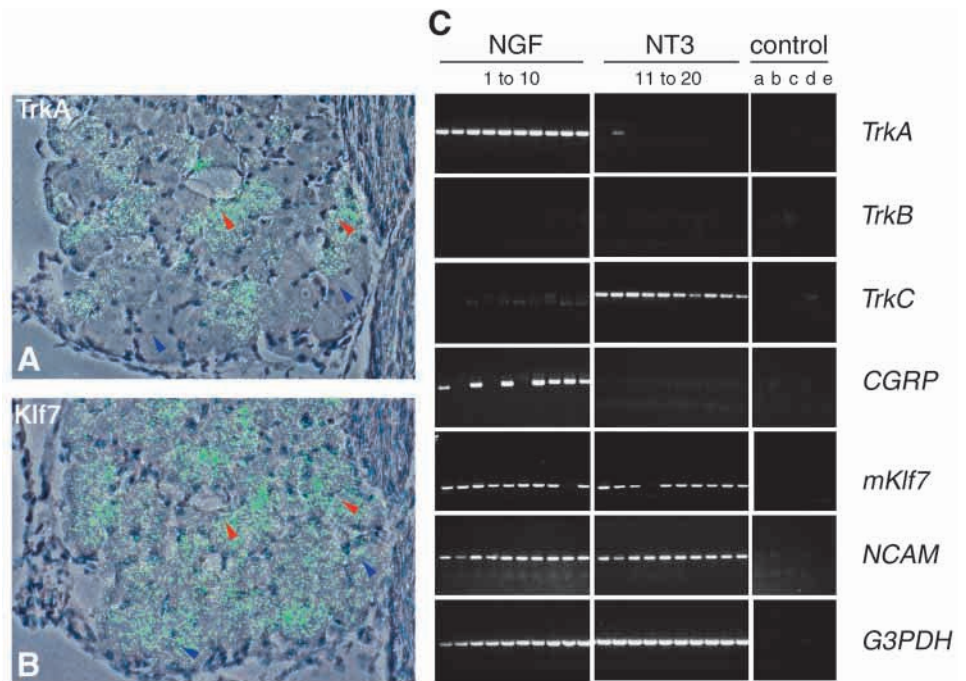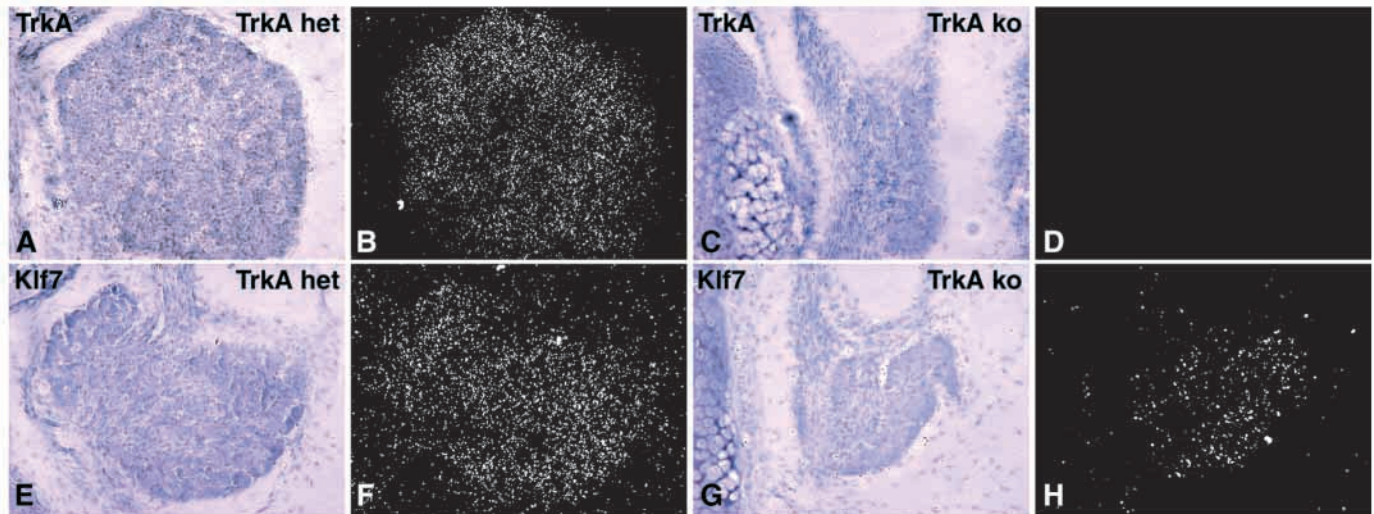

**Fig. 8.** *mKlf7* is expressed in *TrkA*-positive neurons in the DRG of P0 mice. Sections of spinal columns from *TrkA*-heterozygous (A,B,E,F) or *TrkA*-null (C,D,G,H) neonatal pups were hybridized with the *TrkA* probe (A-D) or *mKlf7* probe (E-H). A single DRG is shown in each panel.

*Mash1*-null mice (Guillemot et al., 1993; Johnson et al., 1990; Lo et al., 1991). Sympathetic development in these mutant mice is arrested at embryonic day 10.5 (E10.5) (Guillemot et al., 1993). Similarly, *Phox2b* is expressed in sympathetic ganglia during early development and no sympathetic neurons are formed in *Phox2b* null mice at E13.5 (Pattyn et al., 1999). Because *TrkA* is not expressed in wild-type sympathetic neurons until E17, the failure of sympathetic neuron generation in *Mash1*- and *Phox2b*-null mice must occur in a *TrkA*-independent manner. Furthermore, neural crest-derived sensory neurons are normal in *Mash1*- and *Phox2b*-null mice (Guillemot et al., 1993; Pattyn et al., 1999). These results suggest that it is unlikely that either *Mash1* or *Phox2b* regulates *TrkA* expression. *Ngn1* and *Ngn2* are expressed in sensory ganglia during early gangliogenesis (Ma et al., 1999). In DRG,

*Ngn2* is transiently expressed from E8.75 to E10.5, while *Ngn1* is expressed from E9 to E13, overlapping with the generation of *TrkA*-positive DRG neurons. *Ngn1* is required for generation of *TrkA*-positive neurons, whereas *Ngn2* is required for the generation of *TrkB*-positive and *TrkC*-positive neurons (Fode et al., 1998; Ma et al., 1998; Ma et al., 1999). It is possible that the loss of *TrkA*-positive DRG neurons in *Ngn1*-null mice occurs in a *TrkA*-independent fashion and therefore the apparent lack of *TrkA* expression in these mutant mice may be a consequence of general neuronal death rather than transcriptional downregulation of *TrkA*. To date, no compelling data exist to determine whether *Ngn1* has a direct or indirect impact on *TrkA* expression.

The bHLH gene *NeuroD* (*Neurod1* – Mouse Genome Informatics) is also expressed in DRG and trigeminal ganglia

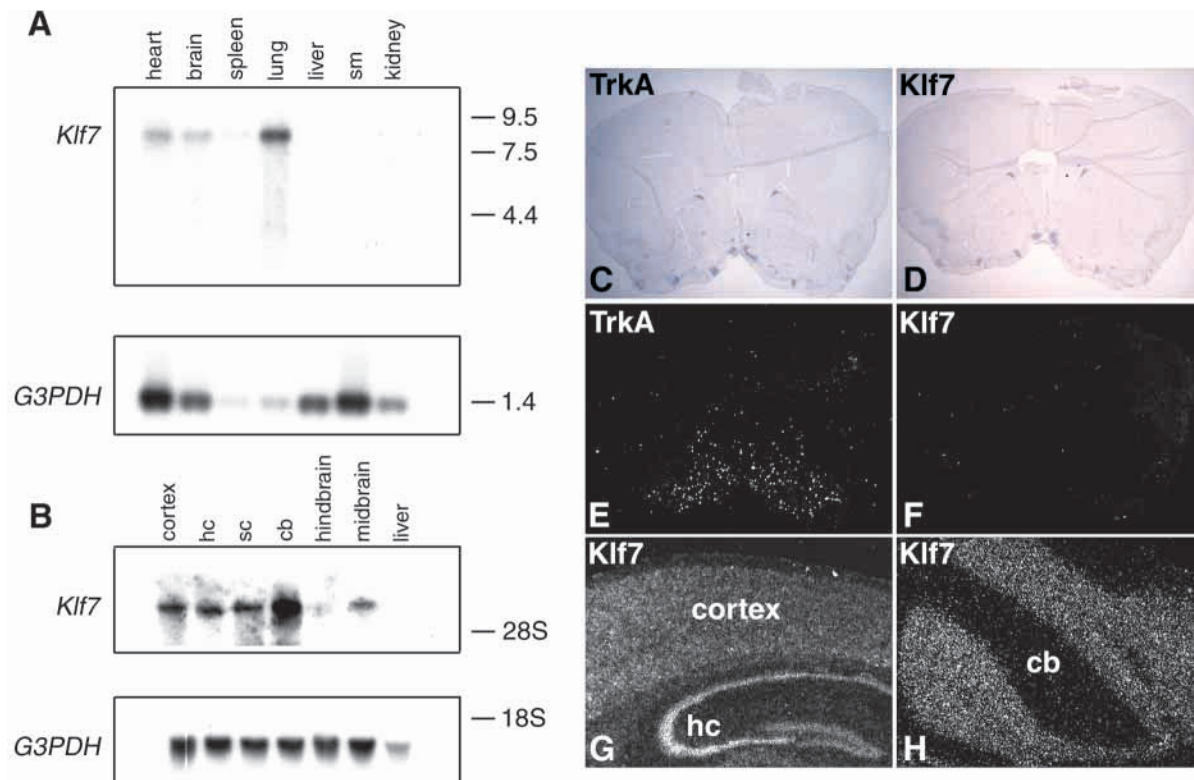

**Fig. 9.** Expression of *mKlf7* in adult tissues. (A) Northern blot analysis of adult mouse tissues. The molecular weight of *mKlf7* mRNA was estimated using an RNA size marker (indicated to the right). (B) Northern blot analysis of various regions of the adult CNS. The positions of 28S and 18S rRNA are indicated. (C-F) Adult brain coronal sections hybridized with the *TrkA* probe (C,E) or the *mKlf7* probe (D,F). (G,H) Dark field pictures of adult brain coronal sections hybridized with the *mKlf7* probe. cb, cerebellum; hc, hippocampus; sc, spinal cord; sm, skeletal muscle.

during early development (Lee et al., 1995). *NeuroD* is implicated in differentiation of neurons and pancreatic beta cells and *NeuroD*-null mice die shortly after birth, owing to severe neonatal diabetes (Lee et al., 1995; Naya et al., 1997). It is unknown whether sensory neurons depend on *NeuroD* for differentiation, although *NeuroD* is required for differentiation of cerebellar and hippocampal granular neurons (Miyata et al., 1999). Another bHLH gene *dHAND* (*Hand2* – Mouse Genome Informatics) is expressed in sympathetic neurons during early development (Srivastava et al., 1995). *dHAND* is sufficient to induce formation of sympathetic neurons when it is expressed ectopically in chick embryos using retroviruses (Howard et al., 2000). However, it is unknown whether *TrkA* is regulated by *dHAND*, although our previous functional analysis indicates a role for HAND-related transcriptional factors in *TrkA* regulation (Ma et al., 2000).

In this study, *mKlf7* was identified as a *TrkA* enhancer-binding protein. The N-terminal domain of human UKLF, identical to the same region of *mKlf7*, is a potent transactivation domain (Matsumoto et al., 1998). Although both *Ikaros2* and *MZF2* sites share similar core sequences for transcription factors containing Kruppel-type zinc fingers (Georgopoulos et al., 1992; Georgopoulos et al., 1997; Hromas et al., 1991), *mKlf7* does not interact with the *MZF2* site. This is probably due to the diverging sequences flanking the core binding sites. This result demonstrates the specificity of the interaction between *mKlf7* and the *Ikaros2 cis* element. Moreover, the decreased interaction between *mKlf7* protein and the mutant *Ikaros2* site is consistent with the severely

decreased activity observed for the *TrkA* enhancer bearing the same mutation in vivo (Ma et al., 2000). Apparently, mutations introduced into the core sequence of the *Ikaros2 cis* element did not completely disrupt the interaction between *mKlf7* and the mutated binding site (Fig. 3B). Therefore, it is possible that the *TrkA* enhancer bearing mutations that abolish the interaction between the *Ikaros2 cis* element and *mKlf7* may be completely inactive in vivo.

#### ***mKlf7* is restricted in the developing nervous system**

Kruppel-like factors constitute a family of transcription factors defined by their conserved C-terminal DNA-binding domains, each consisting of three Cys<sub>2</sub>His<sub>2</sub> type of zinc fingers that are also present in the *Drosophila melanogaster* developmental regulator Kruppel (Schuh et al., 1986; Turner and Crossley, 1999). The GC-box-binding protein Sp1 was the first mammalian Kruppel-like factor identified (Kadonaga et al., 1987). So far, at least 18 different mammalian Kruppel-like factors have been reported (Turner and Crossley, 1999; Uchida et al., 2000). Related transcription factors have also been found in *Saccharomyces cerevisiae* and *Caenorhabditis elegans* (Turner and Crossley, 1999). Many transcription factors containing Kruppel-type zinc fingers have also been reported but not included in the Kruppel-like factor gene family because of the different number and location of the zinc fingers in these proteins.

Although similar in their DNA-binding domains, Kruppel-like factors are divergent in other regions. Furthermore, they

differ in their expression patterns *in vivo* (Turner and Crossley, 1999). This family of transcription factors plays important roles in the control of tissue-specific genes as well as ubiquitously expressed 'housekeeping' genes. The physiological functions of several Kruppel-like factors have been directly demonstrated by gene knockout studies. *Sp1* is widely expressed and *Sp1*-null mice are embryonic lethal with reduced expression of target genes encoding thymidine kinase and methyl-CpG-binding protein MeCP2 (Kadonaga et al., 1987; Marin et al., 1997). *EKLF* (erythroid Kruppel-like factor; *Klf1* – Mouse Genome Informatics) is highly expressed in erythropoietic tissues and *EKLF*-null mice develop fatal anemia (Perkins et al., 1995). *EKLF* is an activator of the  $\beta$ -globin locus control region and essential for the erythropoietin-induced hemoglobin production *in vivo* (Gillemans et al., 1998; Spadaccini et al., 1998). *LKLF* (lung Kruppel-like factor; *Klf2* – Mouse Genome Informatics) is expressed at high levels in lung but also abundant in many other tissues. Besides being required for lung development, *LKLF* is also important for T-cell survival and blood vessel formation (Kuo et al., 1997a; Kuo et al., 1997b; Wani et al., 1999). *GKLF* (gut-enriched Kruppel-like factor; *Klf4* – Mouse Genome Informatics) is expressed in epithelial cells of the epidermis and essential for the barrier function of the skin (Segre et al., 1999; Shields et al., 1996). Therefore, the phenotypes of the *Klf* gene family knockout mice are consistent with the predominant expression sites of these genes *in vivo*.

Although *UKLF*, the human homolog of *mKlf7*, is widely expressed in all human tissues examined (Matsumoto et al., 1998), our study identifies *mKlf7* as the first mammalian Kruppel-like factor that is specifically expressed in the nervous system during development.

### ***mKlf7* is coexpressed with *TrkA* in sensory and sympathetic neurons through embryogenesis and into adulthood**

Our results indicate *mKlf7* expression precedes *TrkA* expression. From E10.5 to adulthood, *mKlf7* is coexpressed in all sensory and sympathetic ganglia with *TrkA*. Of particular note, two novel areas that transiently express *TrkA* are identified in this study: the VII-VIII neural crest complex at E10.5 and E11.5, and the spinal neuroepithelium at E10.5. Strikingly, *mKlf7* is coexpressed in these sites, again supporting the idea of a functional link between expression of this transcription factor and *TrkA*. The *in situ* data using serial sections of adult trigeminal ganglia and the single neuron expression study clearly demonstrate that *mKlf7* is coexpressed with *TrkA* in nociceptive sensory neurons. It is also apparent that *mKlf7* is expressed in other sensory neurons that do not express *TrkA*. This is supported by the reduced expression of *mKlf7* in the *TrkA*-null DRG.

In summary, the specific interaction between mKlf7 protein and the Ikaros2 regulatory element of the *TrkA* enhancer, and the striking coexpression patterns of *mKlf7* and *TrkA* in sensory and sympathetic neurons support the hypothesis that *mKlf7* may directly regulate *TrkA* expression *in vivo*. Because *mKlf7* is also expressed in areas that do not express *TrkA*, other potential target genes of *mKlf7* remain to be identified. In particular, the presence of *mKlf7* in *TrkB*- and *TrkC*-expressing sensory neurons may indicate a role for this transcription factor in the regulation of all *Trk* gene family members in sensory

neurons. *In vivo* mutational, as well as molecular and genetic studies will determine the scope of the biological functions of *mKlf7* during neural development.

### **Note added in proof**

Recent work by Laub et al. describes similar expression results to those found in this study (Laub et al., 2001).

We thank Drs Steven Kernie and Mario Romero, and other members of the Parada lab for helpful discussions. We thank Dr Francesco Ramirez and colleagues for sharing their unpublished results. This work was supported by NIH Grants R01NS33199 and R37NS331999 to L. F. P. L. L. is a recipient of a National Research Service Award from NIH.

### **REFERENCES**

- Anderson, D. J. (1994). Stem cells and transcription factors in the development of the mammalian neural crest. *FASEB J.* **8**, 707-713.
- Anderson, D. J. and Jan, Y. N. (1997). The determination of the neuronal phenotype. In *Molecular and Cellular Approaches to Neural Development* (ed. W. M. Cowan, T. M. Jessell and S. L. Zipursky), pp. 26-63. New York: Oxford University Press.
- Bothwell, M. (1995). Functional interactions of neurotrophins and neurotrophin receptors. *Annu. Rev. Neurosci.* **18**, 223-253.
- Crowley, C., Spencer, S. D., Nishimura, M. C., Chen, K. S., Pitts-Meek, S., Armanini, M. P., Ling, L. H., MacMahon, S. B., Shelton, D. L., Levinson, A. D. et al. (1994). Mice lacking nerve growth factor display perinatal loss of sensory and sympathetic neurons yet develop basal forebrain cholinergic neurons. *Cell* **76**, 1001-1011.
- Dulac, C. and Axel, R. (1995). A novel family of genes encoding putative pheromone receptors in mammals. *Cell* **83**, 195-206.
- Fagan, A. M., Garber, M., Barbacid, M., Silos-Santiago, I. and Holtzman, D. M. (1997). A role for *TrkA* during maturation of striatal and basal forebrain cholinergic neurons *in vivo*. *J. Neurosci.* **17**, 7644-7654.
- Fode, C., Gradwohl, G., Morin, X., Dierich, A., LeMeur, M., Goriadis, C. and Guillemot, F. (1998). The bHLH protein NEUROGENIN 2 is a determination factor for epibranchial placode-derived sensory neurons. *Neuron* **20**, 483-494.
- Georgopoulos, K., Moore, D. D. and Derfler, B. (1992). Ikaros, an early lymphoid-specific transcription factor and a putative mediator for T cell commitment. *Science* **258**, 808-812.
- Georgopoulos, K., Winandy, S. and Avitahl, N. (1997). The role of the Ikaros gene in lymphocyte development and homeostasis. *Annu. Rev. Immunol.* **15**, 155-176.
- Gillemans, N., Tewari, R., Lindeboom, F., Rottier, R., de Wit, T., Wijgerde, M., Grosveld, F. and Philippsen, S. (1998). Altered DNA-binding specificity mutants of *EKLF* and *Sp1* show that *EKLF* is an activator of the beta-globin locus control region *in vivo*. *Genes Dev.* **12**, 2863-28673.
- Guillemot, F., Lo, L. C., Johnson, J. E., Auerbach, A., Anderson, D. J. and Joyner, A. L. (1993). Mammalian achaete-scute homolog 1 is required for the early development of olfactory and autonomic neurons. *Cell* **75**, 463-476.
- Holtzman, D. M., Li, Y., Parada, L. F., Kinsman, S., Chen, C. K., Valletta, J. S., Zhou, J., Long, J. B. and Mobley, W. C. (1992). p140trk mRNA marks NGF-responsive forebrain neurons: evidence that *trk* gene expression is induced by NGF. *Neuron* **9**, 465-478.
- Howard, M. J., Stanke, M., Schneider, C., Wu, X. and Rohrer, H. (2000). The transcription factor dHAND is a downstream effector of BMPs in sympathetic neuron specification. *Development* **127**, 4073-4081.
- Hromas, R., Collins, S. J., Hickstein, D., Raskind, W., Deaven, L. L., O'Hara, P., Hagen, F. S. and Kaushansky, K. (1991). A retinoic acid-responsive human zinc finger gene, MZF-1, preferentially expressed in myeloid cells. *J. Biol. Chem.* **266**, 14183-14187.
- Huang, E. J., Zang, K., Schmidt, A., Saulys, A., Xiang, M. and Reichardt, L. F. (1999). POU domain factor Brn-3a controls the differentiation and survival of trigeminal neurons by regulating *Trk* receptor expression. *Development* **126**, 2869-2882.
- Jan, Y. N. and Jan, L. Y. (1990). Genes required for specifying cell fates in *Drosophila* embryonic sensory nervous system. *Trends Neurosci.* **13**, 493-498.

- Jan, Y. N. and Jan, L. Y. (1993). HLH proteins, fly neurogenesis, and vertebrate myogenesis. *Cell* **75**, 827-830.
- Johnson, J. E., Birren, S. J. and Anderson, D. J. (1990). Two rat homologues of *Drosophila* achaete-scute specifically expressed in neuronal precursors. *Nature* **346**, 858-861.
- Kadonaga, J. T., Carner, K. R., Masiarz, F. R. and Tjian, R. (1987). Isolation of cDNA encoding transcription factor Sp1 and functional analysis of the DNA binding domain. *Cell* **51**, 1079-1090.
- Kaplan, D. R., Hempstead, B. L., Martin-Zanca, D., Chao, M. V. and Parada, L. F. (1991). The *trk* proto-oncogene product: a signal transducing receptor for nerve growth factor. *Science* **252**, 554-558.
- Klein, R., Martin-Zanca, D., Barbacid, M. and Parada, L. F. (1990). Expression of the tyrosine kinase receptor gene *trkB* is confined to the murine embryonic and adult nervous system. *Development* **109**, 845-850.
- Kuo, C. T., Veselits, M. L., Barton, K. P., Lu, M. M., Clendenin, C. and Leiden, J. M. (1997a). The LKLF transcription factor is required for normal tunica media formation and blood vessel stabilization during murine embryogenesis. *Genes Dev.* **11**, 2996-3006.
- Kuo, C. T., Veselits, M. L. and Leiden, J. M. (1997b). LKLF: A transcriptional regulator of single-positive T cell quiescence and survival. *Science* **277**, 1986-1990.
- Laub, F., Aldabe, R., Friedrich, V., Ohnishi, S., Yoshida, T. and Ramirez, F. (2001). Developmental expression of mouse Kruppel-like transcription factor KLF7 (mKLF7) suggests a potential role in neurogenesis. *Dev. Biol.* (in press).
- Lee, J. E., Hollenberg, S. M., Snider, L., Turner, D. L., Lipnick, N. and Weintraub, H. (1995). Conversion of *Xenopus* ectoderm into neurons by NeuroD, a basic helix-loop-helix protein. *Science* **268**, 836-844.
- Lei, L., Ren, D., Finkelstein, A. and Burton, Z. F. (1998). Functions of the N- and C-terminal domains of human RAP74 in transcriptional initiation, elongation, and recycling of RNA polymerase II. *Mol. Cell Biol.* **18**, 2130-2142.
- Levi-Montalcini, R. (1987). The nerve growth factor 35 years later. *Science* **237**, 1154-1162.
- Lewin, G. R. and Barde, Y. A. (1996). Physiology of the neurotrophins. *Annu. Rev. Neurosci.* **19**, 289-317.
- Liebl, D. J., Tessarollo, L., Palko, M. E. and Parada, L. F. (1997). Absence of sensory neurons before target innervation in brain-derived neurotrophic factor-, neurotrophin 3-, and *TrkC*-deficient embryonic mice. *J. Neurosci.* **17**, 9113-9121.
- Liebl, D. J., Huang, W., Young, W. and Parada, L. F. (2001). Regulation of *Trk* receptors following contusion of the rat spinal cord. *Exp. Neurol.* (in press).
- Lo, L. C., Johnson, J. E., Wuenschell, C. W., Saito, T. and Anderson, D. J. (1991). Mammalian achaete-scute homolog 1 is transiently expressed by spatially restricted subsets of early neuroepithelial and neural crest cells. *Genes Dev.* **5**, 1524-1537.
- Ma, Q., Chen, Z., del Barco Barrantes, I., de la Pompa, J. L. and Anderson, D. J. (1998). *neurogenin1* is essential for the determination of neuronal precursors for proximal cranial sensory ganglia. *Neuron* **20**, 469-482.
- Ma, Q., Fode, C., Guillemot, F. and Anderson, D. J. (1999). *Neurogenin1* and *neurogenin2* control two distinct waves of neurogenesis in developing dorsal root ganglia. *Genes Dev.* **13**, 1717-1728.
- Ma, L., Merenmies, J. and Parada, L. F. (2000). Molecular characterization of the *TrkA/NGF* receptor minimal enhancer reveals regulation by multiple cis elements to drive embryonic neuron expression. *Development* **127**, 3777-3788.
- Marin, M., Karis, A., Visser, P., Grosveld, F. and Philipsen, S. (1997). Transcription factor Sp1 is essential for early embryonic development but dispensable for cell growth and differentiation. *Cell* **89**, 619-628.
- Martin-Zanca, D., Barbacid, M. and Parada, L. F. (1990). Expression of the *trk* proto-oncogene is restricted to the sensory cranial and spinal ganglia of neural crest origin in mouse development. *Genes Dev.* **4**, 683-694.
- Matsumoto, N., Laub, F., Aldabe, R., Zhang, W., Ramirez, F., Yoshida, T. and Terada, M. (1998). Cloning the cDNA for a new human zinc finger protein defines a group of closely related Kruppel-like transcription factors. *J. Biol. Chem.* **273**, 28229-28237.
- Miyata, T., Maeda, T. and Lee, J. E. (1999). NeuroD is required for differentiation of the granule cells in the cerebellum and hippocampus. *Genes Dev.* **13**, 1647-52.
- Naya, F. J., Huang, H. P., Qiu, Y., Mutoh, H., DeMayo, F. J., Leiter, A. B. and Tsai, M. J. (1997). Diabetes, defective pancreatic morphogenesis, and abnormal enteroendocrine differentiation in *BETA2/neuroD*-deficient mice. *Genes Dev.* **11**, 2323-2334.
- Nef, S., Allaman, I., Fiumelli, H., De Castro, E. and Nef, P. (1996). Olfaction in birds: differential embryonic expression of nine putative odorant receptor genes in the avian olfactory system. *Mech. Dev.* **55**, 65-77.
- Nolo, R., Abbott, L. A. and Bellen, H. J. (2000). Senseless, a Zn finger transcription factor, is necessary and sufficient for sensory organ development in *Drosophila*. *Cell* **102**, 349-362.
- Parada, L. F., Tsoulfas, P., Tessarollo, L., Blair, J., Reid, S. W. and Soppet, D. (1992). The *Trk* family of tyrosine kinases: receptors for NGF-related neurotrophins. *Cold Spring Harb. Symp. Quant. Biol.* **57**, 43-51.
- Pattyn, A., Morin, X., Cremer, H., Goridis, C. and Brunet, J. F. (1999). The homeobox gene *Phox2b* is essential for the development of autonomic neural crest derivatives. *Nature* **399**, 366-370.
- Perkins, A. C., Sharpe, A. H. and Orkin, S. H. (1995). Lethal beta-thalassaemia in mice lacking the erythroid CACCC-transcription factor EKLf. *Nature* **375**, 318-322.
- Pfaff, S. and Kintner, C. (1998). Neuronal diversification: development of motor neuron subtypes. *Curr. Opin. Neurobiol.* **8**, 27-36.
- Phillips, H. S. and Armanini, M. P. (1996). Expression of the *trk* family of neurotrophin receptors in developing and adult dorsal root ganglion neurons. *Philos. Trans. R. Soc. Lond. B Biol. Sci.* **351**, 413-416.
- Schecterson, L. C. and Bothwell, M. (1992). Novel roles for neurotrophins are suggested by BDNF and NT-3 mRNA expression in developing neurons. *Neuron* **9**, 449-463.
- Schuh, R., Aicher, W., Gaul, U., Cote, S., Preiss, A., Maier, D., Seifert, E., Nauber, U., Schroder, C., Kemler, R. et al. (1986). A conserved family of nuclear proteins containing structural elements of the finger protein encoded by *Kruppel*, a *Drosophila* segmentation gene. *Cell* **47**, 1025-1032.
- Segre, J. A., Bauer, C. and Fuchs, E. (1999). *Klf4* is a transcription factor required for establishing the barrier function of the skin. *Nat. Genet.* **22**, 356-360.
- Shields, J. M., Christy, R. J. and Yang, V. W. (1996). Identification and characterization of a gene encoding a gut-enriched Kruppel-like factor expressed during growth arrest. *J. Biol. Chem.* **271**, 20009-20017.
- Singh, H., LeBowitz, J. H., Baldwin, A. S., Jr and Sharp, P. A. (1988). Molecular cloning of an enhancer binding protein: isolation by screening of an expression library with a recognition site DNA. *Cell* **52**, 415-423.
- Smeyne, R. J., Klein, R., Schnapp, A., Long, L. K., Bryant, S., Lewin, A., Lira, S. A. and Barbacid, M. (1994). Severe sensory and sympathetic neuropathies in mice carrying a disrupted *Trk/NGF* receptor gene. *Nature* **368**, 246-249.
- Snider, W. D. (1994). Functions of the neurotrophins during nervous system development: what the knockouts are teaching us. *Cell* **77**, 627-638.
- Sobreviela, T., Clary, D. O., Reichardt, L. F., Brandabur, M. M., Kordower, J. H. and Mufson, E. J. (1994). *TrkA*-immunoreactive profiles in the central nervous system: colocalization with neurons containing p75 nerve growth factor receptor, choline acetyltransferase, and serotonin. *J. Comp. Neurol.* **350**, 587-611.
- Spadaccini, A., Tilbrook, P. A., Sarna, M. K., Crossley, M., Bieker, J. J. and Klinken, S. P. (1998). Transcription factor erythroid Kruppel-like factor (EKLf) is essential for the erythropoietin-induced hemoglobin production but not for proliferation, viability, or morphological maturation. *J. Biol. Chem.* **273**, 23793-23798.
- Srivastava, D., Cserjesi, P. and Olson, E. N. (1995). A subclass of bHLH proteins required for cardiac morphogenesis. *Science* **270**, 1995-1999.
- Tessarollo, L., Tsoulfas, P., Martin-Zanca, D., Gilbert, D. J., Jenkins, N. A., Copeland, N. G. and Parada, L. F. (1993). *trkC*, a receptor for neurotrophin-3, is widely expressed in the developing nervous system and in non-neuronal tissues. *Development* **118**, 463-475.
- Turner, J. and Crossley, M. (1999). Mammalian Kruppel-like transcription factors: more than just a pretty finger. *Trends Biochem. Sci.* **24**, 236-240.
- Uchida, S., Tanaka, Y., Ito, H., Saitoh-Ohara, F., Inazawa, J., Yokoyama, K. K., Sasaki, S. and Marumo, F. (2000). Transcriptional regulation of the *CLC-K1* promoter by myc-associated zinc finger protein and kidney-enriched Kruppel-like factor, a novel zinc finger repressor. *Mol. Cell Biol.* **20**, 7319-7331.
- Vogel, K. S., Brannan, C. I., Jenkins, N. A., Copeland, N. G. and Parada, L. F. (1995). Loss of neurofibromin results in neurotrophin-independent survival of embryonic sensory and sympathetic neurons. *Cell* **82**, 733-742.
- Wani, M. A., Wert, S. E. and Lingrel, J. B. (1999). Lung Kruppel-like factor, a zinc finger transcription factor, is essential for normal lung development. *J. Biol. Chem.* **274**, 21180-21185.
- Wright, D. E. and Snider, W. D. (1995). Neurotrophin receptor mRNA expression defines distinct populations of neurons in rat dorsal root ganglia. *J. Comp. Neurol.* **351**, 329-338.
